# Supplementary material
Source: PubMed Central journal article supplement (PMC9877105)

702

703

| <b>Supplemental Table 1. Primary outcome stratified by hospital delivery volume</b> |                                |                             |                           |                                                 |
|-------------------------------------------------------------------------------------|--------------------------------|-----------------------------|---------------------------|-------------------------------------------------|
| Primary outcome                                                                     | Umbilical cord milking (N=872) | Early cord clamping (N=858) | Crude odds ratio (95% CI) | Odds ratio (95% CI) accounting for study design |
| NICU admission by predefined criteria                                               |                                |                             |                           |                                                 |
| Low Delivery Volume*                                                                | 120/519 (23.1)                 | 129/558 (23.1)              | 1.00 (0.75-1.33)          | 1.04 (0.77-1.41)                                |
| High Delivery Volume†                                                               | 79/353 (22.4)                  | 110/300 (36.7)              | 0.50 (0.35-0.70)          | 0.42 (0.26-0.70)                                |
| Data are n (%), unless otherwise noted.                                             |                                |                             |                           |                                                 |
| * Based on reported deliveries < 5000 births per year                               |                                |                             |                           |                                                 |
| † Based in reported deliveries >5000 births per year                                |                                |                             |                           |                                                 |

704

705

706

707

708 Supplemental Figure 1. CONSORT diagram. Screening, Eligibility, and Randomization

709 Supplemental Figure 2 NICU admission by hospital, randomization group and  
710 intervention performed in 1<sup>st</sup> period.

711

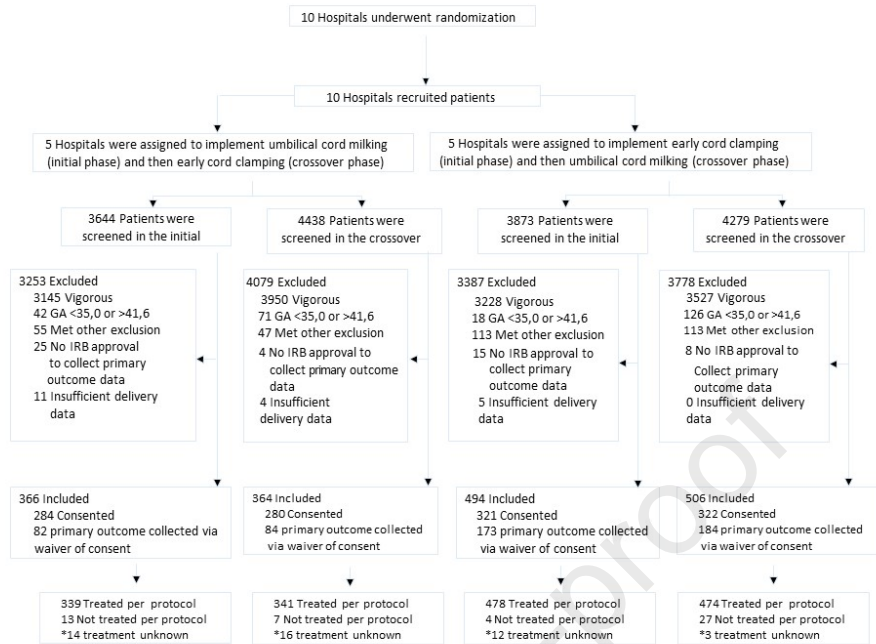

Supplement: NIHMS1830986-supplement-2.pdf [file NIHMS1830986-supplement-2.pdf]
